# Supplementary material
Source: Springer Nature journal article supplement (https://www.springermedizin.de/resource/supplementary/12889_2013_5742_MOESM2_ESM.docx/9496120)
Supplement: MOESM2 [file 9496120]

General

p=0.017

72.9

%

64.1

57.1

Physicians

p=0.003

71.1

Nurses

%

p=0.065

40.5

52.5

%

69.2

76.4

59.0

**Figure 2 Prevalence of the report lack of time for physical activity counseling according to the number of patients seen by health professionals on a weekly basis.**
